# Supplementary material for: Further characterisation of rotavirus cores: Ss(+)RNAs can be packaged in vitro but packaging lacks sequence specificity
Source: PubMed Central journal article supplement — Virus Res. 2013 Dec 26;178(2):252–63. doi: 10.1016/j.virusres.2013.09.034 (PMC3854842; doi:10.1016/j.virusres.2013.09.034), 2013-12-26
Supplement: mmc1.pdf [file mmc1.pdf]

## Supplementary Figures

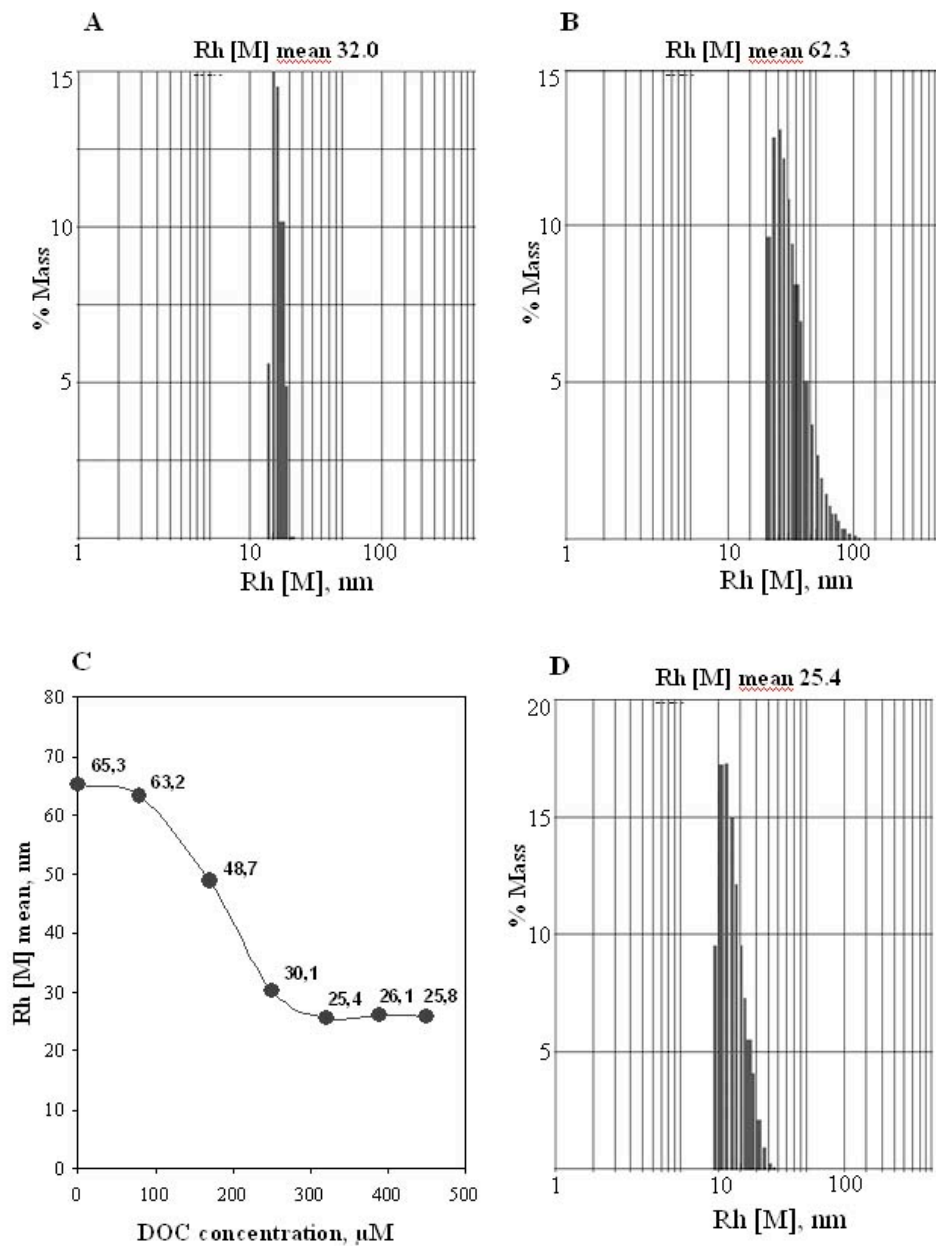

### Supplementary Figure S1

*Dynamic light scattering of rotavirus DLPs and purified cores: Titration of disaggregation of cores by DOC*

A. Mass distribution of DLPs (Rh(M)mean 32.0 nm; PI 8 %); B. Mass distribution of purified rotavirus cores (Aggregates: Rh(M) 62.3 nm; PI 34 %); C. Titration of the disaggregation of rotavirus cores in the presence of 80 – 450  $\mu\text{M}$  DOC; D. Mass distribution of rotavirus cores in the presence of 320  $\mu\text{M}$  DOC (Rh(M) 25.4 nm; PI 20 %).

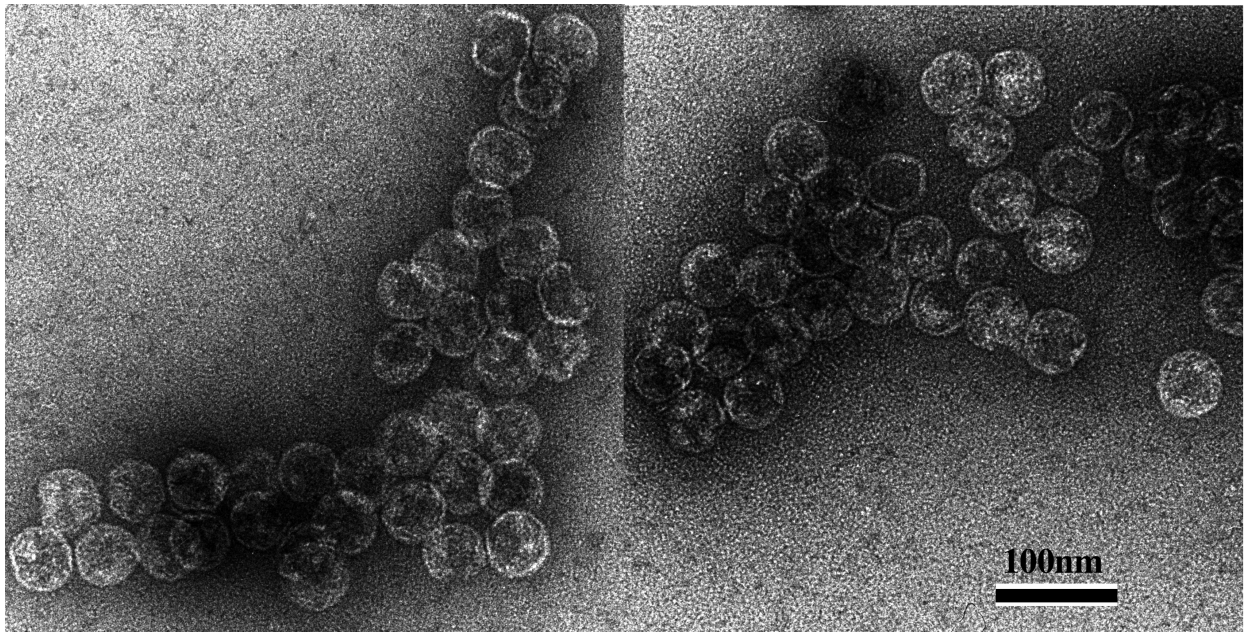

**A**

**B**

***Supplementary Figure S2***

*Electron microscopy of core-like particles*

A. Untreated; B. Treated by 10 mM EGTA. The particles form aggregates. The calibration bar indicates 100 nm.

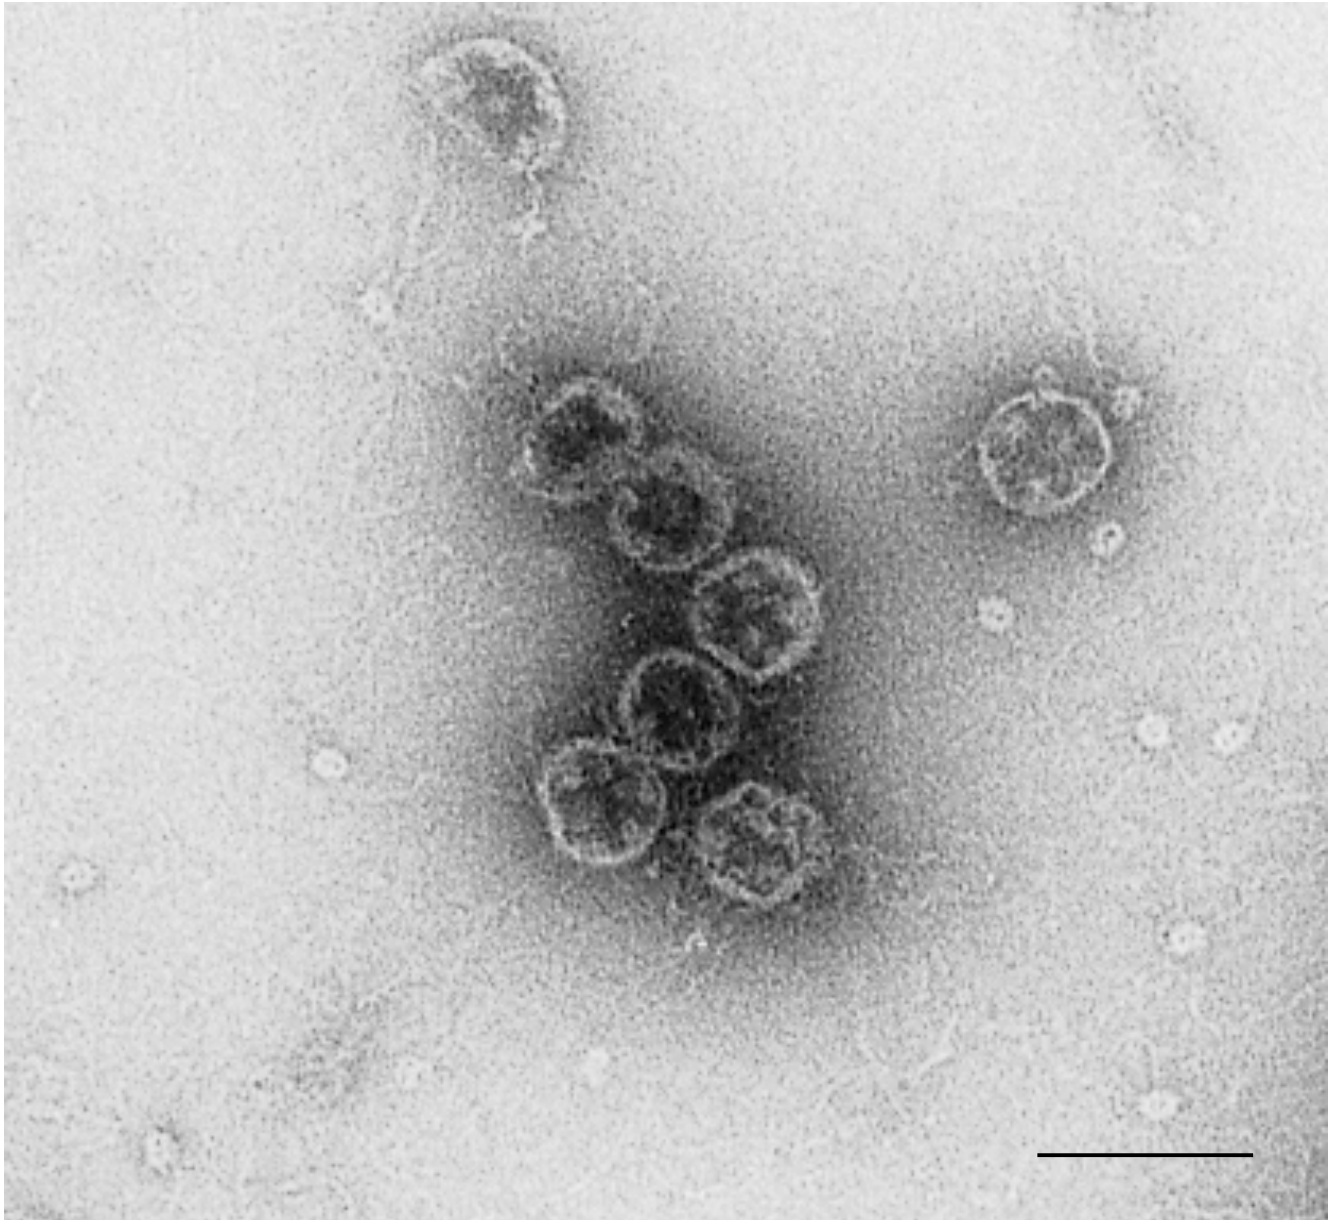

***Supplementary Figure S3***

Enlarged panel B of Figure 4. Calibration bar: 100 nm





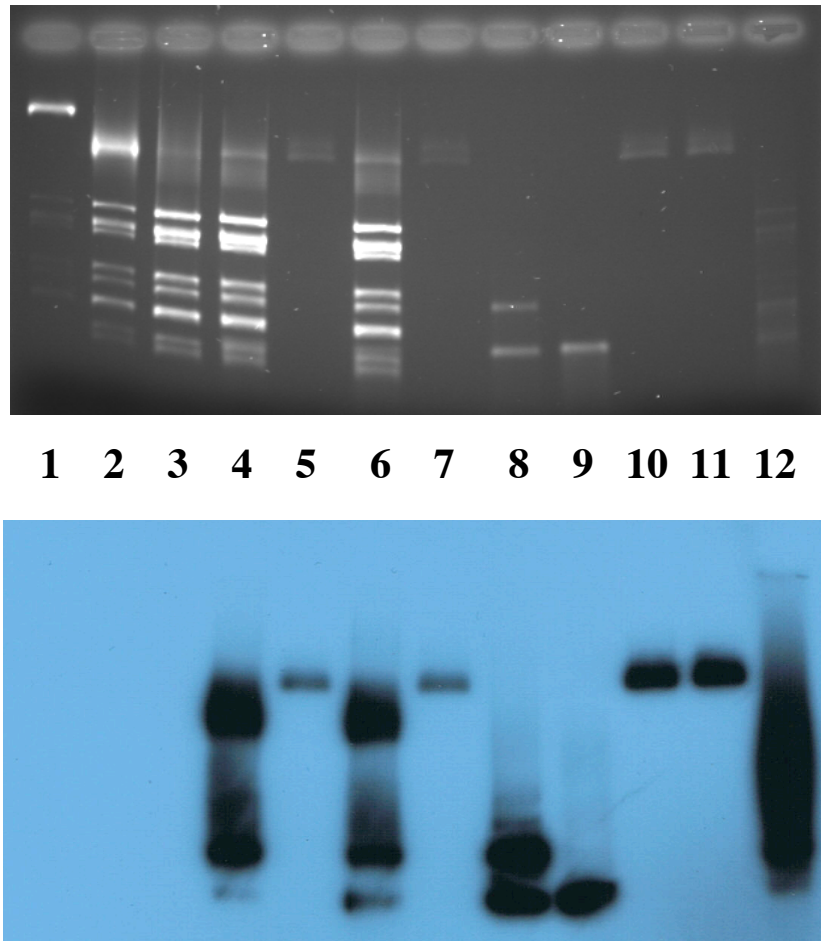

***Supplementary Figure S4***

*Non-specificity of packaging of RNA into rotavirus cores in vitro: Preheating of viral RNAs*

0.8 % agarose gel, MOPS-Tris buffer 10 mM, pH 7.7. A. Gel unfixed, stained with ethidium bromide; B. Gel fixed, dried and autoradiographed. Lane 1: DLPs; lane 2: native RV cores; lane 3: cores + EGTA; lane 4: cores + EGTA + <sup>32</sup>P-labelled RV RNA7 + packaging mixture; lane 5: as in lane 4 + RNase I; lanes 6, 7: as lanes 4, 5, with RNA7 heated at 80°C for 1 min; lane 8: RNA7; lane 9: RNA7, heated at 80°C for 1 min; lane 10: as in lane 4, using <sup>32</sup>P-labelled HIV-2 RNA1104; lane 11: as in lane 10, HIV-2 RNA1104 heated at 80°C for 1 min; lane 12: HIV-2 RNA1104.

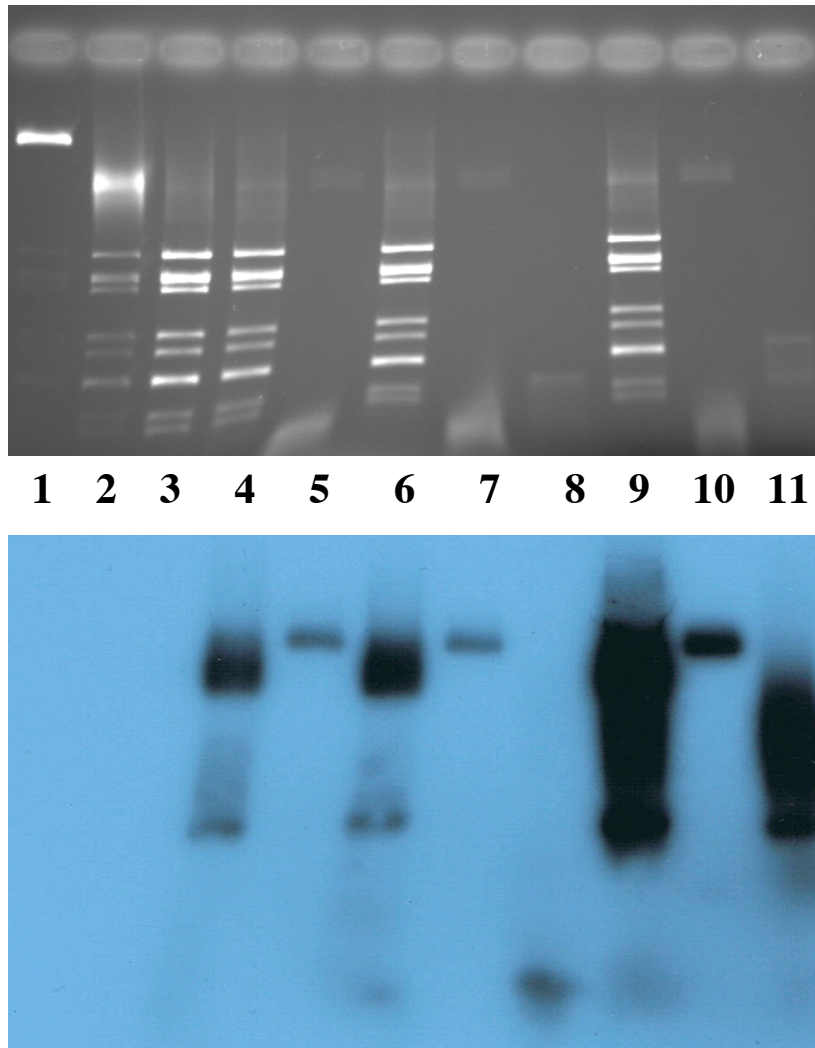

***Supplementary Figure S5***

*Non-specificity of packaging of RNA into rotavirus cores in vitro: Influence of electrolyte concentration in packaging mixture*

0.8 % agarose gel, MOPS-Tris buffer 10 mM, pH 7.7. A. Gel unfixed, stained with ethidium bromide; B. Gel fixed, dried and autoradiographed. Lane 1: DLPs; lane 2: native RV cores; lane 3: cores + EGTA; lane 4: cores + EGTA + preheated <sup>32</sup>P-labelled RV RNA7 + packaging mixture; lane 5: as in lane 4 + RNase I; lanes 6, 7: as lanes 4, 5, low concentration of electrolytes in packaging mixture (8 mM NaCl omitted) ; lane 8: RNA7; lanes 9, 10: as in lanes 4, 5, using HIV-2 RNA1104; lane 11: HIV-2 RNA1104 heated at 80°C for 1 min.

## Homologous and heterologous RV and HIV-2 competitive core packaging assays

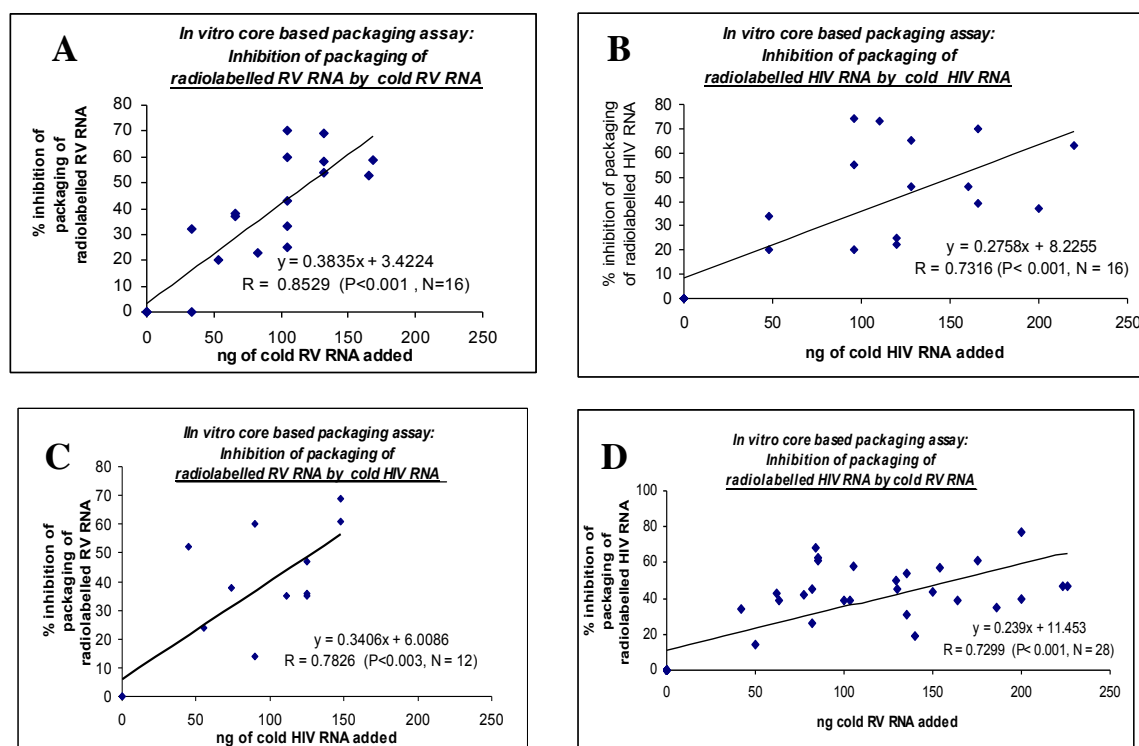

### Supplementary Figure 6

#### Competitive packaging of RV and HIV RNAs into opened and restabilised RV cores

Rotavirus RNAs and HIV-2 RNA fragments were transcribed *in vitro* from cDNAs or RT-PCR amplicons and radiolabelled using T7 RNA polymerase and  $\alpha$ - $^{32}$ P-UTP. The products were purified by RNAeasy mini-elute columns and quantitated by spectrophotometry (Nanodrop system). Mixtures of radiolabelled and cold RNAs (homologous and heterologous) at various ratios were tested for packaging using opened and restabilised rotavirus cores. Subsequently, reaction mixtures were treated with RNase One (only packaged ssRNA will be protected) and electrophoretically separated on non-denaturing MOPS-Tris (20 mM, pH 7.7) agarose gels which were dried and subjected to autoradiography. Radiolabelled RNA packaged into cores was densitometrically quantitated using the Image-J program (<http://rsbweb.nih.gov/ij/>).

- |    |                                                      |
|----|------------------------------------------------------|
| A. | Competition of radiolabelled RV RNA with cold RV RNA |
| B. | “ “ “ HIV “ “ “ HIV “                                |
| C. | “ “ “ RV “ “ “ HIV “                                 |
| D. | “ “ “ HIV “ “ “ RV “                                 |
